# Supplementary material for: Enhancing Treatment Precision: Evaluating The Validity and Reliability of Modified NutricheQ in Detecting Iron Deficiency in Children Aged 1-3 Years in Indonesia
Source: Research Square preprint supplement (doi:10.21203/rs.3.rs-6566656/v1), 2025-05-27
Supplement: Supplementary file 1 [file 0284a6109e7ac3328c76ef00.docx]

**Supplementary Material 2. Modified NutricheQ for the Indonesian Population (English version)**

***This is the translated version made for publication purposes. Original version is available in Supplementary Material 1.***

| Question Item | 0 | 1 | 2 |
| --- | --- | --- | --- |
| 1. How much formula milk (growing-up milk) does your child consume in a day? | More or equal to 600 ml daily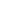 | 300 - 600 ml daily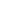 | Less than 300 ml daily or not given daily or never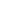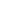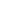 |
| 1. How many portions of chicken or beef liver does your child consume in a week?   (One portion of chicken liver is defined as one whole piece of liver; one portion of beef liver is defined as a piece of liver with minimum size of a standard match box) | 5 or more than 5 portions a week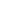 | 2-4 portions a week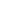 | One portion a week, less than one a week, or never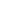 |
| 1. How many portions of red meat (beef, mutton, or lamb (chicken and fisha are not included)) does your child consume in a week?   (One portion of red meat is defined as a piece of meat with the minimum size of a standard match box) | 5 or more than 5 portions a week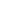 | 2-4 portions a week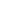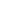 | One portion a week, less than one a week, or never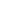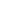 |
| 1. How often does your child consume red-meat-based food (such as meatballs, corned beef, and sausages) in a week? | 5 times or more than 5 times a week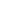 | 2-4 times a week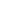 | One portion a week, less than one a week, or never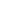 |
| 1. How many portions of chicken, duck or quail eggs does your child consume in a week?   (One portion of chicken/duck egg is defined as one egg; one portion of quail egg is defined as 3 eggs) | 5 or more than 5 portions a week | 2-4 portions a week | One portion a week, less than one a week, or never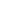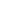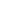 |
