# Supplementary material for: Enhancing Treatment Precision: Evaluating The Validity and Reliability of Modified NutricheQ in Detecting Iron Deficiency in Children Aged 1-3 Years in Indonesia
Source: Research Square preprint supplement (doi:10.21203/rs.3.rs-6566656/v1), 2025-05-27
Supplement: Supplementary file 2 [file fdf38c7a6249297648c688e4.docx]

**Supplementary Material 1. Modified NutricheQ for the Indonesian Population.
*Translated version is available in Supplementary Material 2***

| Pertanyaan | 0 | 1 | 2 |
| --- | --- | --- | --- |
| 1. Berapa banyak batita Ibu minum susu formula untuk usia 1 tahun ke atas (susu pertumbuhan) dalam sehari? | Lebih atau sama dengan 600 ml susu setiap hari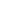 | 300 - 600 ml susu setiap hari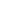 | Kurang dari 300 ml setiap hari atau tidak pernah/tidak setiap hari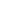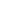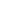 |
| 1. Berapa porsi hati ayam atau hati sapi yang dikonsumsi batita ibu dalam seminggu?   (Satu porsi hati ayam adalah satu buah, satu porsi hati sapi adalah seukuran minimal satu kotak korek api) | 5 kali atau lebih seminggu 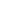 | 2-4 kali seminggu 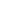 | 1 kali seminggu atau kurang atau tidak pernah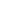 |
| 1. Berapa porsi daging merah (daging sapi, domba, kambing - **tidak termasuk** ayam atau ikan) yang dikonsumsi batita ibu dalam seminggu?   (Satu porsi daging merah adalah seukuran minimal satu kotak korek api) | 5 kali atau lebih seminggu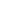 | 2-4 kali dalam seminggu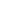 | 1 kali seminggu atau kurang atau tidak pernah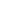 |
| 1. Berapa sering batita ibu mengonsumsi produk olahan daging merah (bakso sapi, kornet sapi, sosis sapi) dalam seminggu? | 5 kali atau lebih seminggu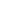 | 2-4 kali dalam seminggu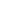 | 1 kali seminggu atau kurang atau tidak pernah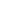 |
| 1. Berapa porsi telur ayam/bebek/puyuh (putih dan kuning telur) yang dikonsumsi batita ibu dalam seminggu?   (Satu porsi telur ayam/bebek adalah satu butir, satu porsi telur puyuh adalah 3 butir) | 5 kali atau lebih seminggu | 2-4 butir seminggu | 1 kali seminggu atau jarang atau tidak pernah 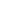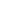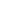 |
